# Supplementary material for: Contrasting Effects of Singlet Oxygen and Hydrogen Peroxide on Bacterial Community Composition in a Humic Lake
Source: PubMed Central journal article supplement (PMC3965437; doi:10.1371/journal.pone.0092518), 2014-03-25
Supplement: pone.0092518.s001.pdf [file pone.0092518.s001.pdf]

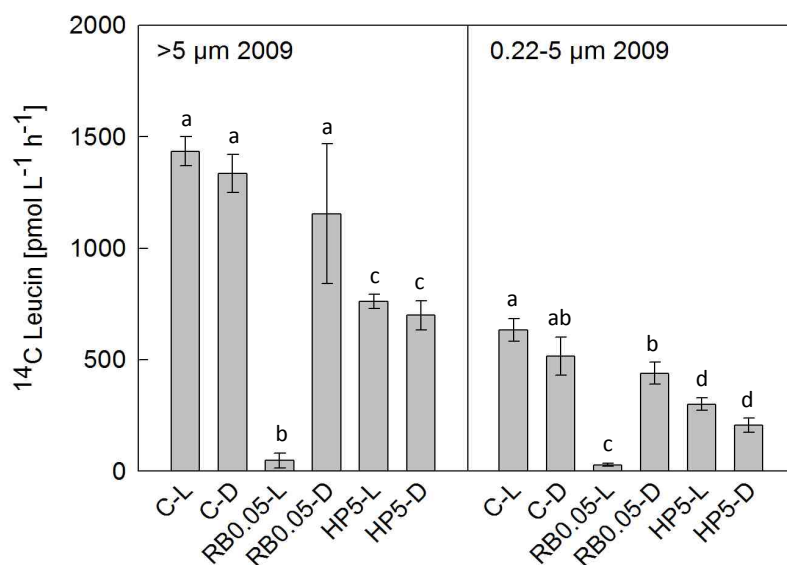

**Figure S1**

Activity of heterotrophic bacteria after  $^1\text{O}_2$  and  $\text{H}_2\text{O}_2$  exposure – separate analysis of particle-attached ( $>5 \mu\text{m}$ ) and free-living ( $5 - 0.22 \mu\text{m}$ ) fractions in experiments of 14<sup>th</sup> August 2009. Activity of heterotrophic bacteria was determined by  $^{14}\text{C}$ -labeled leucine incorporation. Different letters at top of the bars depict significant differences between values as determined by one-way ANOVA followed by pair-wise multiple comparison analysis with the Tukey test. C-L/D: Light and dark control incubations, RB-L: Light incubation with increased  $[\text{}^1\text{O}_2]_{\text{SS}}$ , RB-D: Dark control for RB, HP-L/D: Light and dark incubations with  $\text{H}_2\text{O}_2$ . Numbers behind RB and HP represent  $\mu\text{M}$  concentrations used of RB and  $\text{H}_2\text{O}_2$ .
