# Supplementary material for: Contrasting Effects of Singlet Oxygen and Hydrogen Peroxide on Bacterial Community Composition in a Humic Lake
Source: PubMed Central journal article supplement (PMC3965437; doi:10.1371/journal.pone.0092518), 2014-03-25
Supplement: pone.0092518.s003.pdf [file pone.0092518.s003.pdf]

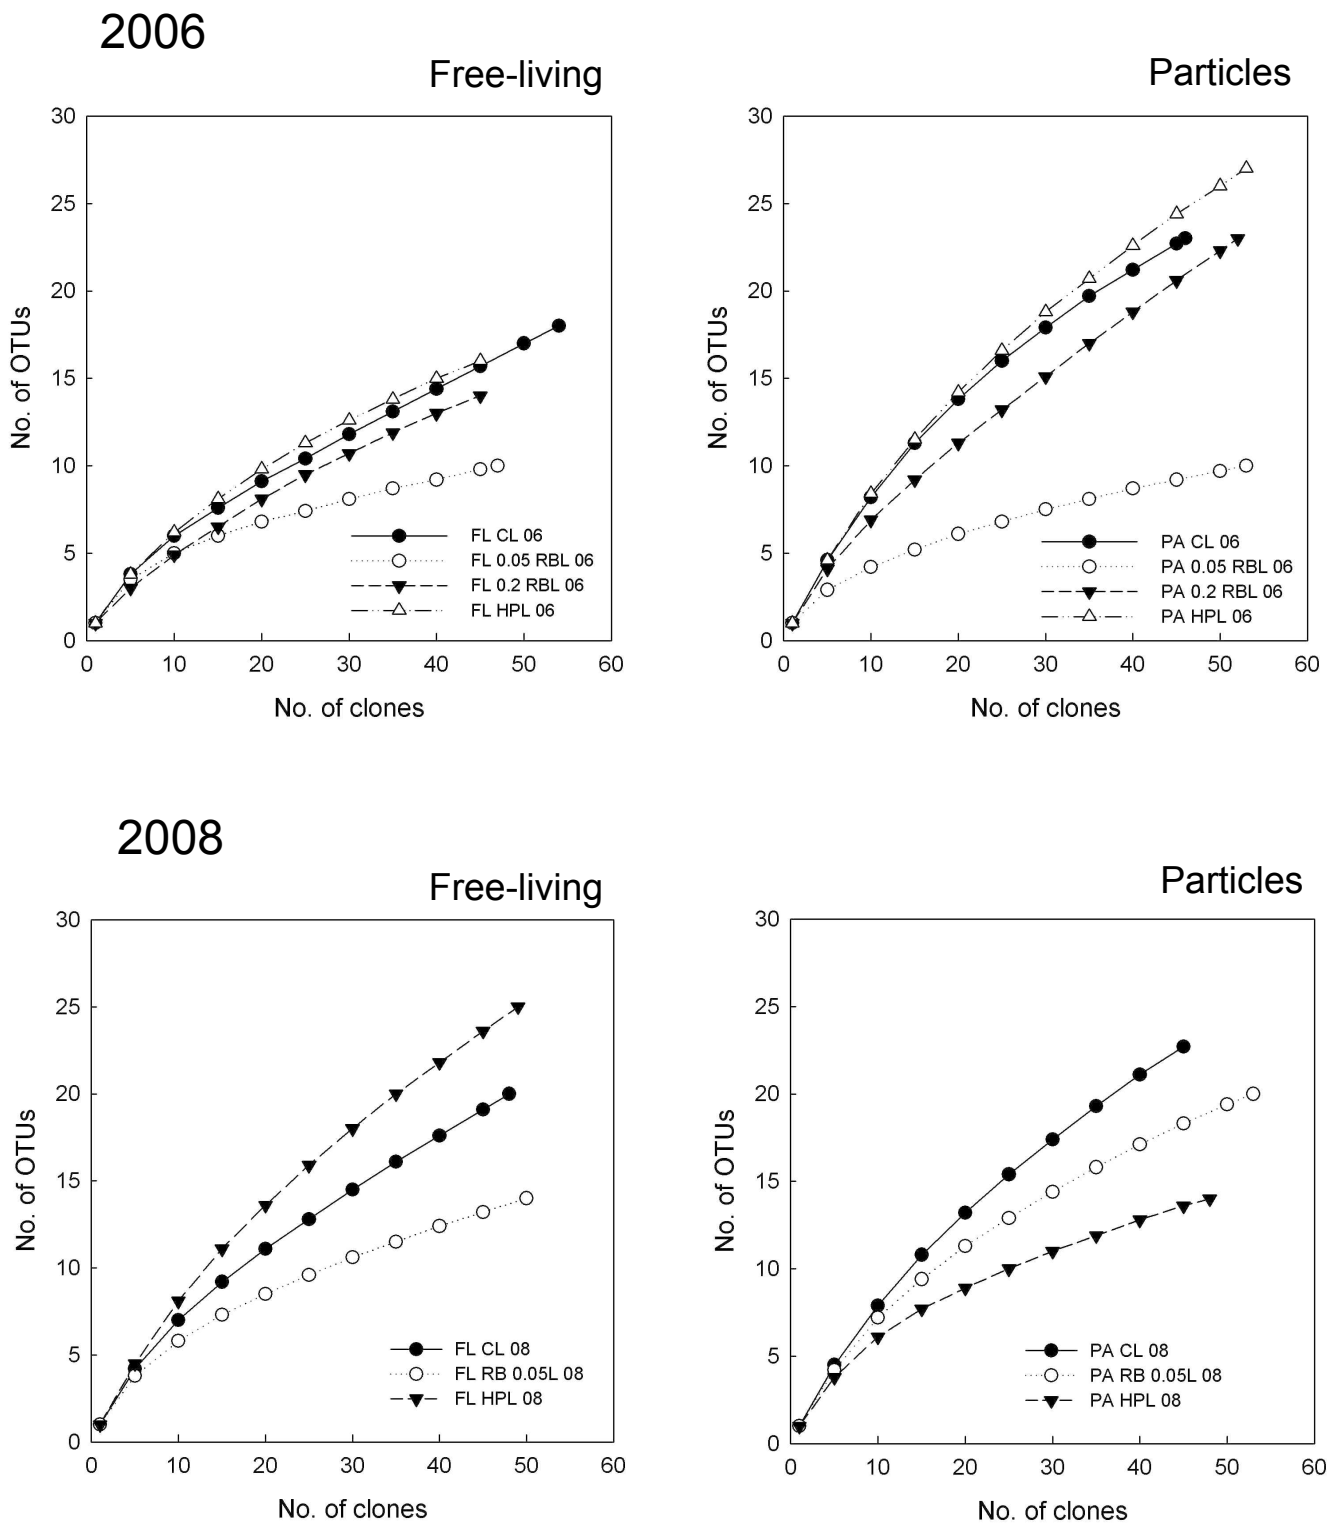

**Figure S3**

Rarefaction analysis of nearly full-length 16S rRNA gene clone libraries generated for the treatments with increased  $^1\text{O}_2$  (RB-L),  $\text{H}_2\text{O}_2$  light incubations (HP-L), and light controls (C-L) 2006 and 2008, respectively. Free-living (0.22-8  $\mu\text{m}$  in 2006 and 0.22-5  $\mu\text{m}$  in 2008 and 2009, FL) and particle-attached (>8 or >5  $\mu\text{m}$ , respectively, PA) bacterioplankton were investigated separately, respectively. Approximately 50 clones were investigated for each clone library. OTUs were defined from combined ARDRA pattern generated with HaeIII and RsaI.
