# Supplementary material for: Contrasting Effects of Singlet Oxygen and Hydrogen Peroxide on Bacterial Community Composition in a Humic Lake
Source: PubMed Central journal article supplement (PMC3965437; doi:10.1371/journal.pone.0092518), 2014-03-25
Supplement: pone.0092518.s004.pdf [file pone.0092518.s004.pdf]

Pearson correlation (Opt:0.40%) [0.0%-100.0%]

**2006**

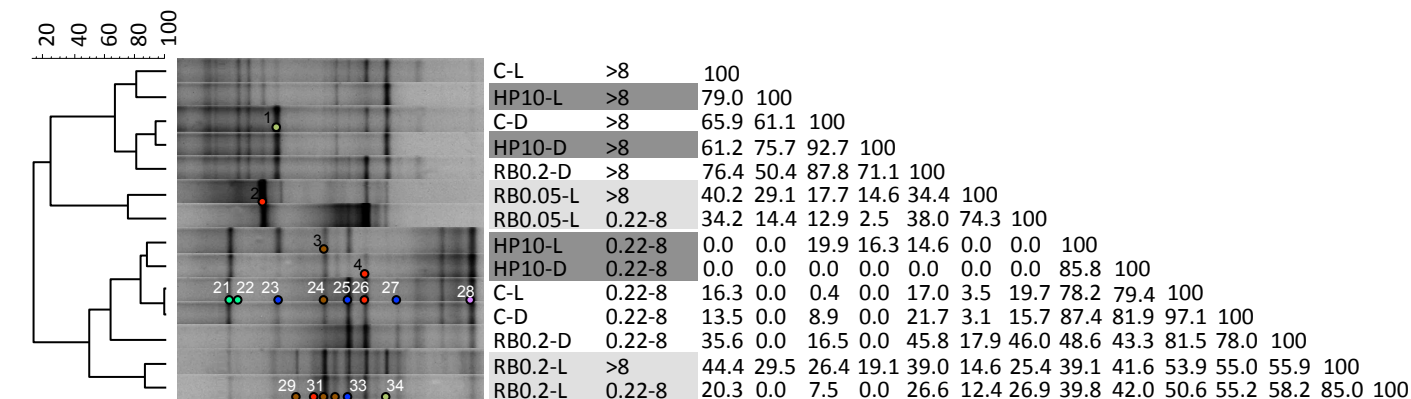

**2008**

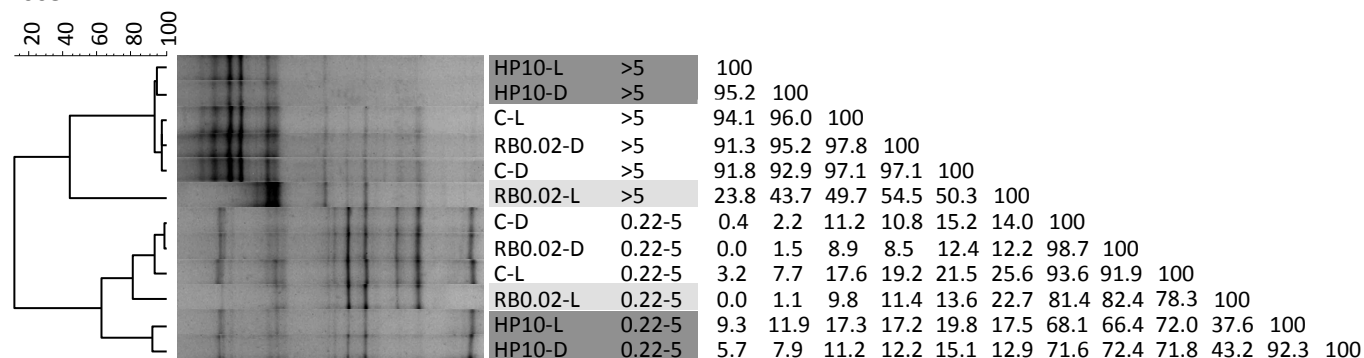

**2009**

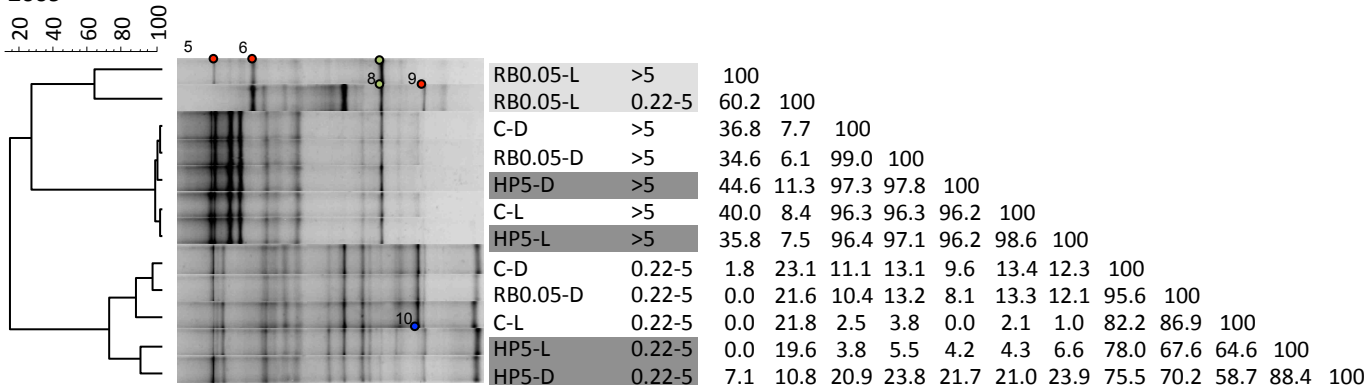

**Figure S4**

Distance matrices of Pearson correlation based UPGMA cluster analysis performed for *Bacteria* RT-PCR DGGE patterns of *in situ* experiments 2006, 2008, and 2009. Abbreviations are given in Figure S2. White numbers on DGGE bands correspond to DGGE band sequences determined in respective PCR-DGGE pattern of the same experiment published previously (Glaeser *et al.*, 2010). Colours indicate the phylogenetic affiliation: *Actinobacteria* (purple), *Gammaproteobacteria* (brown), *Alphaproteobacteria* (red), and *Betaproteobacteria* (blue).
