# Supplementary material for: Contrasting Effects of Singlet Oxygen and Hydrogen Peroxide on Bacterial Community Composition in a Humic Lake
Source: PubMed Central journal article supplement (PMC3965437; doi:10.1371/journal.pone.0092518), 2014-03-25
Supplement: pone.0092518.s006.pdf [file pone.0092518.s006.pdf]

Pearson correlation (Opt:0.40%) [0.0%-100.0%]

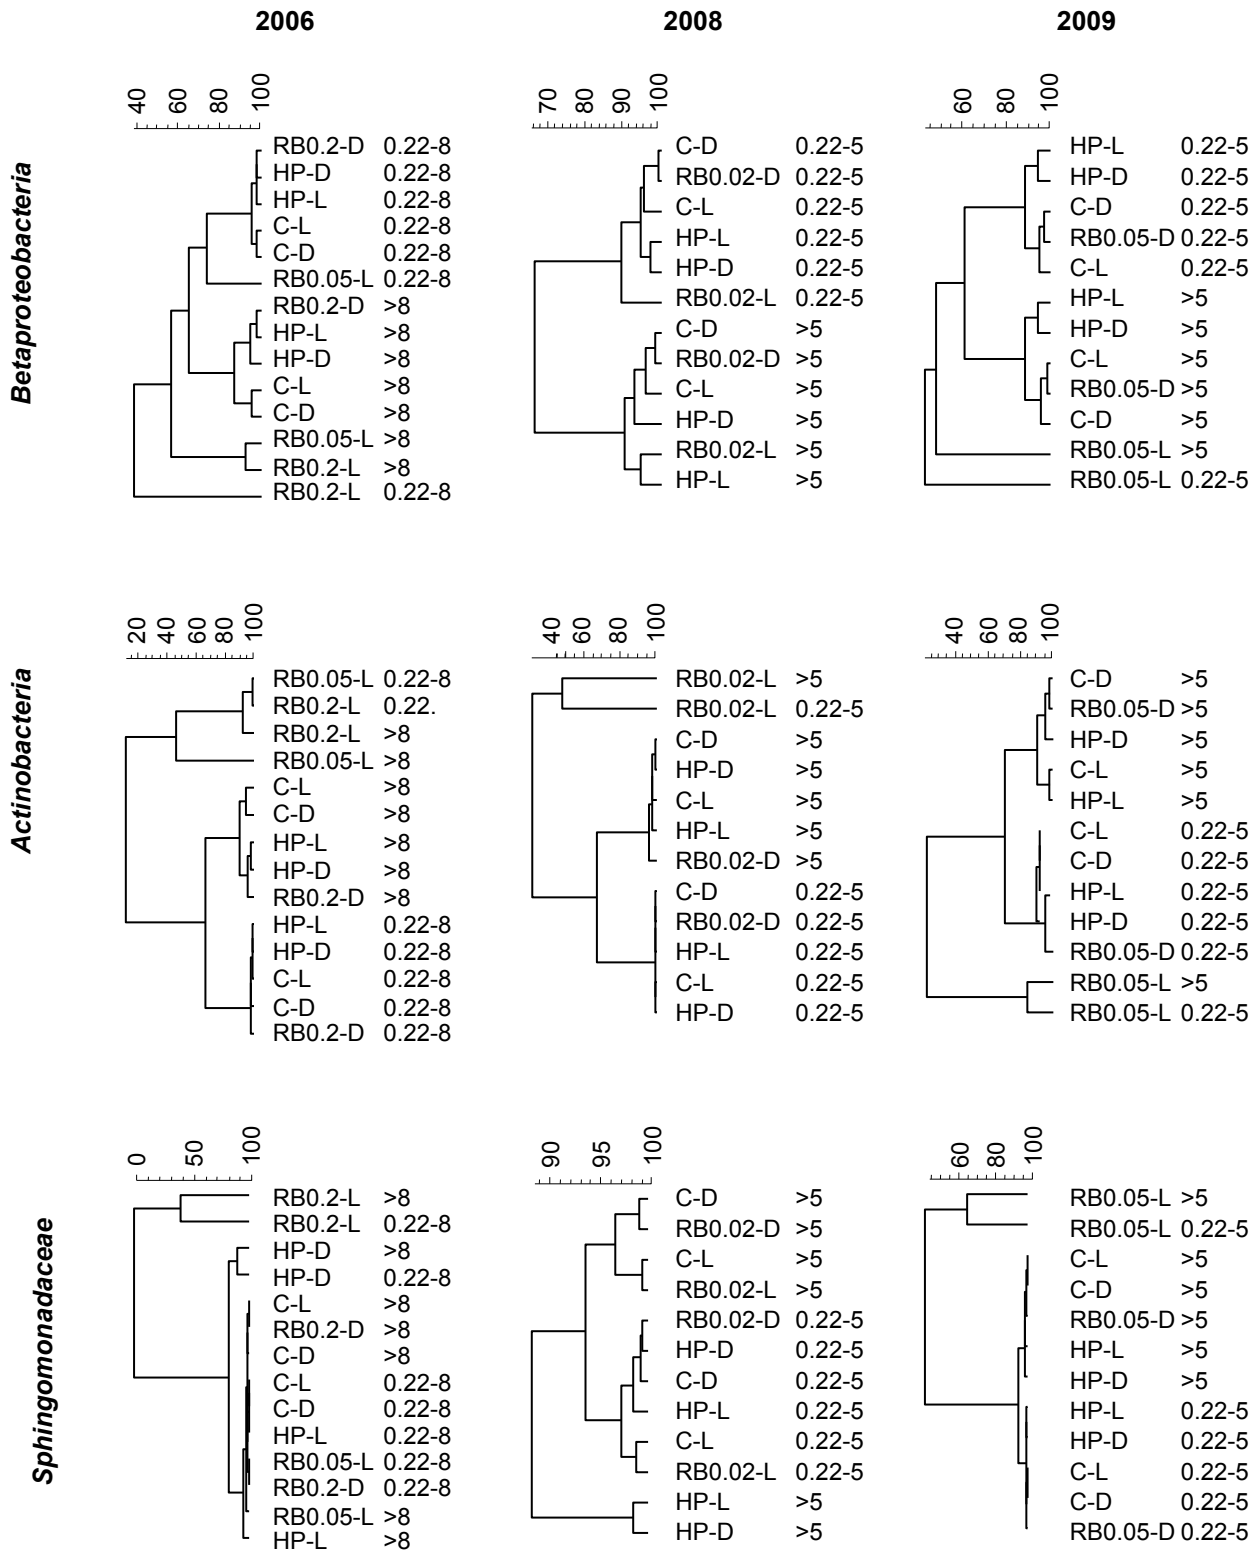

**Figure S6**

Cluster analysis of *Betaproteobacteria*, *Actinobacteria*, and *Sphingomonadaceae*-specific 16S rRNA gene based RT-PCR DGGE analysis. Free-living (0.22-8  $\mu\text{m}$  in 2006 and 0.22-5  $\mu\text{m}$  in 2008 and 2009) and particle-attached (>8 or >5  $\mu\text{m}$ , respectively) bacteria of all treatments of the *in situ* experiments 2006, 2008, and 2009 were investigated. The UPGMA cluster analyses based on the Pearson correlation that considers the DNA band intensities. Abbreviations are given in Figure S2.
