# Supplementary material for: Contrasting Effects of Singlet Oxygen and Hydrogen Peroxide on Bacterial Community Composition in a Humic Lake
Source: PubMed Central journal article supplement (PMC3965437; doi:10.1371/journal.pone.0092518), 2014-03-25
Supplement: pone.0092518.s007.pdf [file pone.0092518.s007.pdf]

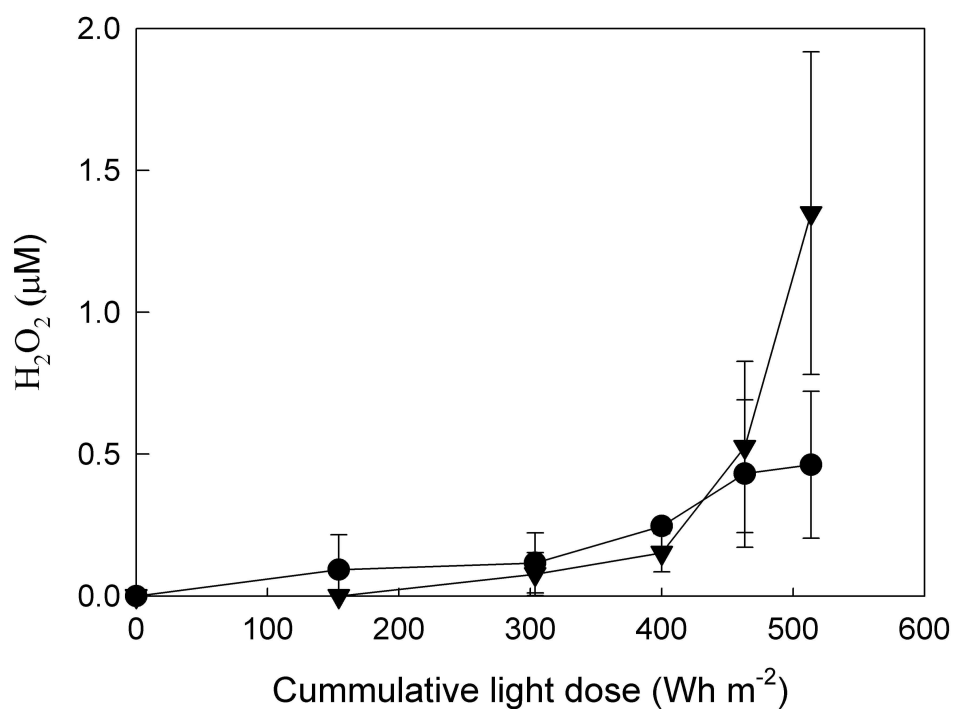

**Figure S7**

Delayed formation of hydrogen peroxide (H<sub>2</sub>O<sub>2</sub>) in 0.22 µm filtered water samples exposed to natural sunlight. Samples were used for exposure experiments directly after sampling. Filled circles represent H<sub>2</sub>O<sub>2</sub> concentrations filled triangles for samples obtained from wells inside the acidic fen. Water samples were obtained on 2<sup>nd</sup> September 2008 from the SW basin. Error bars indicate the standard deviation of three analysed samples.
