# Supplementary material for: Contrasting Effects of Singlet Oxygen and Hydrogen Peroxide on Bacterial Community Composition in a Humic Lake
Source: PubMed Central journal article supplement (PMC3965437; doi:10.1371/journal.pone.0092518), 2014-03-25
Supplement: pone.0092518.s009.pdf [file pone.0092518.s009.pdf]

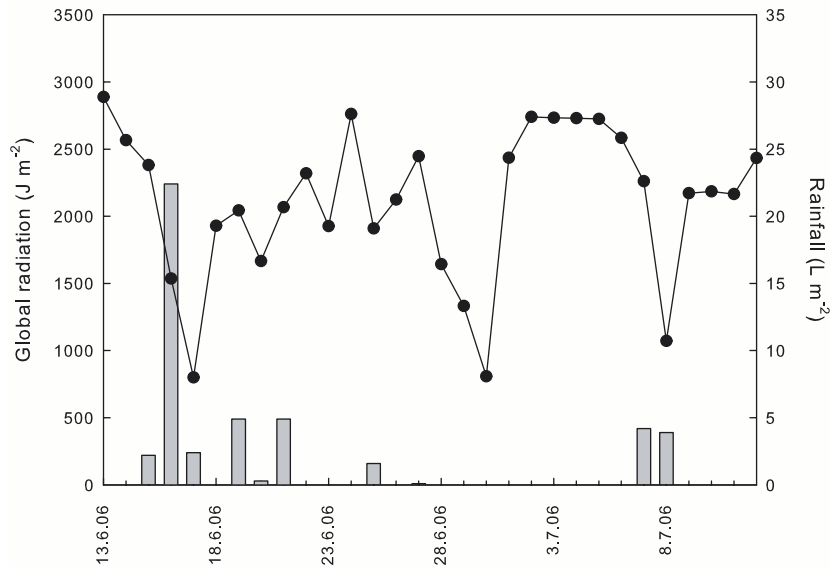

**2006**

Rain: 46.9 L m<sup>-2</sup>

Light: 63379 J m<sup>-2</sup>

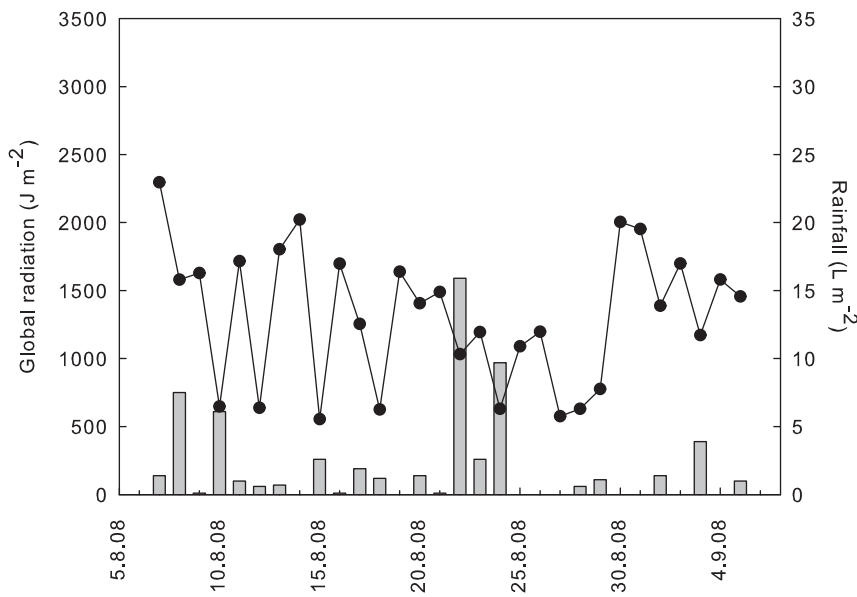

**2008**

Rain: 60.9 L m<sup>-2</sup>

Light: 39380 J m<sup>-2</sup>

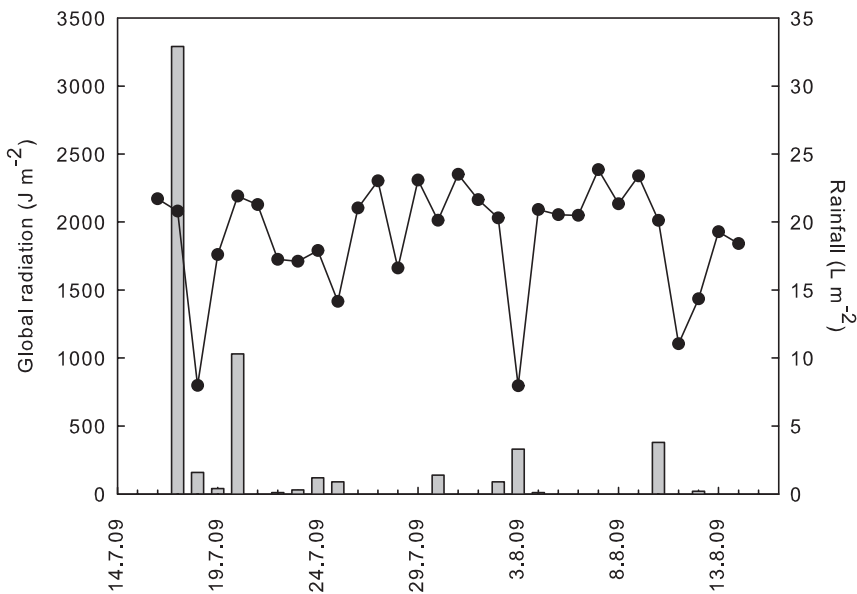

**2009**

Rain: 57.4 L m<sup>-2</sup>

Light: 56870 J m<sup>-2</sup>

**Figure S9**

Weather data for 30 day prior to the experiments carried out in 2006, 2008, and 2009, were obtained at the weather station in Menz (53°10' N, 13°05' E), which is closely located to Lake Grosse Fuchskuhle and purchased from the Deutscher Wetterdienst ([www.dwd.de](http://www.dwd.de)). Filled circles: global radiation. Bars: rainfall.
