# Supplementary material for: Contrasting Effects of Singlet Oxygen and Hydrogen Peroxide on Bacterial Community Composition in a Humic Lake
Source: PubMed Central journal article supplement (PMC3965437; doi:10.1371/journal.pone.0092518), 2014-03-25
Supplement: pone.0092518.s011.pdf [file pone.0092518.s011.pdf]

**Table S2**

Cell numbers of *in situ* incubation experiments in 2006 and 2008. Cell counts of Sybr Green I stained cells collected on 0.22  $\mu\text{m}$  membrane filters. Standard deviations of ten counts from each experiment are given in brackets. Cell counts were divided into cells with length of  $>0.35 \mu\text{m}$  and  $<0.35 \mu\text{m}$  (representing micrococoid cells). C-L/D: Control of light and dark incubations, RB-L: treatments with increased  $[\text{}^1\text{O}_2]_{\text{SS}}$ ; numbers indicate  $\mu\text{M}$  concentrations of RB added, RB-D: Dark control of RB treatments, HP10-L/D: Light and dark incubations with  $10 \mu\text{M}$   $\text{H}_2\text{O}_2$ .

| Experiment                                           | Total<br>[ $\times 10^6$ cells $\text{mL}^{-1}$ ] | $>0.35 \mu\text{m}$<br>[ $\times 10^6$ cells $\text{mL}^{-1}$ ] | $<0.35 \mu\text{m}$<br>Micrococoids<br>[ $\times 10^6$ cells $\text{mL}^{-1}$ ] | Fraction of<br>$<0.35 \mu\text{m}$ cells<br>(%) |
|------------------------------------------------------|---------------------------------------------------|-----------------------------------------------------------------|---------------------------------------------------------------------------------|-------------------------------------------------|
| <b><i>In situ</i> experiment 2006 (02. July)</b>     |                                                   |                                                                 |                                                                                 |                                                 |
| C-L                                                  | 3.71 ( $\pm 0.3$ )                                | 1.85 ( $\pm 0.22$ )                                             | 1.86 ( $\pm 0.19$ )                                                             | 50.1 ( $\pm 2.9$ )                              |
| C-D                                                  | 4.71 ( $\pm 1.1$ )                                | 2.14 ( $\pm 0.70$ )                                             | 2.57 ( $\pm 0.84$ )                                                             | 54.5 ( $\pm 12.7$ )                             |
| RB0.05-L                                             | 3.72 ( $\pm 0.58$ )                               | 1.03 ( $\pm 0.19$ )                                             | 2.69 ( $\pm 0.44$ )                                                             | 72.4 ( $\pm 3.2$ )                              |
| RB0.2-L                                              | 4.45 ( $\pm 0.54$ )                               | 1.76 ( $\pm 0.24$ )                                             | 2.68 ( $\pm 0.51$ )                                                             | 60.3 ( $\pm 8.7$ )                              |
| RB0.2-D                                              | 4.08 ( $\pm 0.32$ )                               | 2.31 ( $\pm 0.19$ )                                             | 1.77 ( $\pm 0.26$ )                                                             | 43.4 ( $\pm 5.5$ )                              |
| HP10-L                                               | 4.00 ( $\pm 0.50$ )                               | 1.71 ( $\pm 0.25$ )                                             | 2.29 ( $\pm 0.35$ )                                                             | 57.2 ( $\pm 5.1$ )                              |
| HP10-D                                               | 4.95 ( $\pm 0.45$ )                               | 2.25 ( $\pm 0.30$ )                                             | 2.70 ( $\pm 0.52$ )                                                             | 54.6 ( $\pm 9.3$ )                              |
| <b><i>In situ</i> experiment 2008 (5. September)</b> |                                                   |                                                                 |                                                                                 |                                                 |
| C-L                                                  | 2.06 ( $\pm 0.18$ )                               | 0.51 ( $\pm 0.10$ )                                             | 1.55 ( $\pm 0.17$ )                                                             | 75.1 ( $\pm 5.2$ )                              |
| C-D                                                  | 1.30 ( $\pm 0.08$ )                               | 0.45 ( $\pm 0.04$ )                                             | 0.85 ( $\pm 0.06$ )                                                             | 65.2 ( $\pm 2.4$ )                              |
| RB0.02-L                                             | 3.37 ( $\pm 0.53$ )                               | 0.47 ( $\pm 0.06$ )                                             | 2.90 ( $\pm 0.52$ )                                                             | 86.1 ( $\pm 7.0$ )                              |
| RB0.02-D                                             | 2.00 ( $\pm 0.10$ )                               | 0.49 ( $\pm 0.07$ )                                             | 1.51 ( $\pm 0.10$ )                                                             | 75.4 ( $\pm 3.4$ )                              |
| HP10-L                                               | 1.36 ( $\pm 0.24$ )                               | 0.41 ( $\pm 0.06$ )                                             | 0.94 ( $\pm 0.21$ )                                                             | 69.5 ( $\pm 9.4$ )                              |
| HP10-D                                               | 1.36 ( $\pm 0.16$ )                               | 0.39 ( $\pm 0.05$ )                                             | 0.97 ( $\pm 0.15$ )                                                             | 71.2 ( $\pm 7.5$ )                              |
