# Supplementary material for: Contrasting Effects of Singlet Oxygen and Hydrogen Peroxide on Bacterial Community Composition in a Humic Lake
Source: PubMed Central journal article supplement (PMC3965437; doi:10.1371/journal.pone.0092518), 2014-03-25
Supplement: pone.0092518.s012.pdf [file pone.0092518.s012.pdf]

**Table S3**

Physico-chemical parameters measured in surface waters of Lake Grosse Fuchskuhle SW basin during the experimental periods in 2006, 2008, and 2009. Data for pH, temperature and oxygen were monitored according to [1].

| <b>Parameter</b>                         | <b>Lake Grosse Fuchskuhle</b>       |                   |                   |
|------------------------------------------|-------------------------------------|-------------------|-------------------|
| Geographical position                    | 53°10'N, 13°02'E <sup>1</sup>       |                   |                   |
| Maximum depth (m)                        | 5.6 <sup>1</sup>                    |                   |                   |
| Surface area (km <sup>2</sup> )          | 0.02 <sup>1</sup>                   |                   |                   |
| Volume (10 <sup>6</sup> m <sup>3</sup> ) | 0.05 <sup>1</sup>                   |                   |                   |
| Catchment area (km <sup>2</sup> )        | 0.005 <sup>1</sup>                  |                   |                   |
| Characteristics of catchment area        | Mixed forest, fen area <sup>1</sup> |                   |                   |
| Trophy                                   | Dystrophic <sup>1</sup>             |                   |                   |
|                                          | <b>SW surface water</b>             |                   |                   |
| Year                                     | 2006 <sup>2</sup>                   | 2008 <sup>3</sup> | 2009 <sup>4</sup> |
| pH                                       | 4.65                                | 4.55              | 4.5               |
| Temperature (°C)                         | 23.9                                | 17.4              | 19                |
| Oxygen (mg L <sup>-1</sup> )             | 4.3                                 | 4.8               | 4.6               |

<sup>1</sup>Data taken from [2, 3]<sup>2</sup> 13<sup>th</sup> July 2006; <sup>3</sup> 01<sup>st</sup> September 2008; <sup>4</sup> 19<sup>th</sup> August 2009

### References:

1. Glaeser J, Overmann J (2003) Characterization and *in situ* carbon metabolism of phototrophic consortia. Appl Environ Microbiol 69: 3739-3750.
2. Allgaier M, Grossart H-P (2006) Seasonal dynamics and phylogenetic diversity of free-living and particle-associated bacterial communities in four lakes in northeastern Germany. Aquat Microb Ecol 45: 115-128.
3. Allgaier M, Grossart H-P (2006) Diversity and seasonal dynamics of Actinobacteria populations in four lakes in northeastern Germany. Appl Environ Microbiol 72: 3489-3497.
