# Supplementary material for: Contrasting Effects of Singlet Oxygen and Hydrogen Peroxide on Bacterial Community Composition in a Humic Lake
Source: PubMed Central journal article supplement (PMC3965437; doi:10.1371/journal.pone.0092518), 2014-03-25
Supplement: pone.0092518.s013.pdf [file pone.0092518.s013.pdf]

**Table S4**

Sequences of 16S rRNA gene targeting oligonucleotide primer used for RT-PCR DGGE analysis. Sequences for the GC clamps are given in the footnotes 2 and 3.

| Primer                   | Target group                                                                                        | Sequence (5' → 3')    | Reference |
|--------------------------|-----------------------------------------------------------------------------------------------------|-----------------------|-----------|
| GC-339F <sup>2</sup>     | <i>Bacteria</i>                                                                                     | CTCCTACGGGAGGCAGCAG   | [1]       |
| GC-517F <sup>2</sup>     | <i>Bacteria</i>                                                                                     | GTGCCAGCAGCCGCGG      | [2]       |
| 907R                     | <i>Bacteria</i>                                                                                     | CCGTCAATTCCTTTGAGTTT  | [1]       |
| GC-1055R <sup>2</sup>    | <i>Bacteria</i>                                                                                     | AGCTGACGACAGCCAT      | [3]       |
| GC-Beta359F <sup>2</sup> | <i>Betaproteobacteria</i>                                                                           | GGGGAATTTTGGACAATGGG  | [4]       |
| Beta680F                 | <i>Betaproteobacteria</i>                                                                           | CRCGTGTAGCAGTGA       | [5]       |
| Beta680R                 | <i>Betaproteobacteria</i>                                                                           | TCACTGCTACACGYG       | [5]       |
| GC-HGC236F <sup>3</sup>  | <i>Actinobacteria</i>                                                                               | GCGGCCTATCAGCTTGTT    | [6]       |
| HGC664R                  | <i>Actinobacteria</i>                                                                               | AGGAATTCCAGTCTCCCC    | [6]       |
| ADF681R                  | <i>Alphaproteobacteria,</i><br><i>some</i><br><i>Deltaproteobacteria</i><br><i>and Fusobacteria</i> | AATTCACCTCTACT        | [5]       |
| ALF968R                  | <i>Alphaproteobacteria</i>                                                                          | GGTAAGGTTCTGCGCGTT    | [7]       |
| Sphingo108F <sup>2</sup> | <i>Sphingomonadaceae</i>                                                                            | GCGTAACGCG TGGGAATCTG | [8]       |

F: forward primer R: reverse primer

<sup>1</sup> The numbering of the positions is according to the 16S rRNA gene sequences of the *rrnB* operon of *E. coli* (J01695) [9]

<sup>2</sup> GC clamp sequence: CGCCCGCCGCGCCCCGCGCCCGGCCCGCCGCCCCCGCCCC

<sup>3</sup> GC clamp sequence: CGCCCGCCGCGCCCCGCGCCCGTCCCGCCGCCCCCGCCG

## References

1. Muyzer G, de Waal EC, Uitterlinden AG (1993) Profiling of complex microbial populations by denaturing gradient gel electrophoresis analysis of polymerase chain reaction-amplified genes coding for 16S rRNA. *Appl Environ Microbiol* 59: 695-700.
2. Overmann J, Coolen MJL, Tuschak C (1999) Specific detection of different phylogenetic groups of chemocline bacteria based on PCR and denaturing gradient gel electrophoresis of 16S rRNA gene fragments. *Arch Microbiol* 172: 83-94.
3. Lane DJ (1991) 16S/23S rRNA sequencing. In: Stackebrandt E, Goodfellow M, editors. *Nucleic acid techniques in bacterial systematics*. Chichester: John Wiley. pp. 115-174.
4. Mühlhling M, Woolven-Allen J, Murrell JC, Joint I (2008) Improved group-specific PCR primers for denaturing gradient gel electrophoresis analysis of the genetic diversity of complex microbial communities. *ISME J* 2: 379-392.
5. Blackwood CB, Oaks A, Buyers JS (2005) Phylum- and class-specific PCR primers for general microbial community analysis. *Appl Environ Microbiol* 71: 6193-6198.

6. Glöckner FO, Zaichikov E, Belkova N, Denissova L, Pernthaler J, et al. (2000) Comparative 16S rRNA analysis of lake bacterioplankton reveals globally distributed phylogenetic clusters including an abundant group of *Actinobacteria*. *Appl Environ Microbiol* 66: 5053-5065.
7. Neef A (1997) Anwendung der *in situ*-Einzelzell-identifizierung von Bakterien zur Populationsanalyse in komplexen mikrobiellen Biozönosen. Dissertation, Technical University of Munich.
8. Leys NM, Ryngaert A, Bastiaens L, Top EM, Verstraete W, et al. (2005) Culture independent detection of *Sphingomonas* sp EPA 505 related strains in soils contaminated with polycyclic aromatic hydrocarbons (PAHs). *Microb Ecol* 49: 443-450.
9. Brosius J, Palmer ML, Kennedy PJ, Noller HF (1978) Complete nucleotide-sequence of a 16S ribosomal-RNA gene from *Escherichia coli*. *Proc Nat Acad Sci USA* 75: 4801-4805.
