# Supplementary material for: Contrasting Effects of Singlet Oxygen and Hydrogen Peroxide on Bacterial Community Composition in a Humic Lake
Source: PubMed Central journal article supplement (PMC3965437; doi:10.1371/journal.pone.0092518), 2014-03-25
Supplement: pone.0092518.s014.pdf [file pone.0092518.s014.pdf]

**Table S5**

PCR and RT-PCR programs for the amplification of 16S rRNA and 16S rRNA gene fragments of *Bacteria* and bacterial subgroups used for DGGE fingerprint analysis. All RT-PCR programs started with a reverse transcriptase step of 30 min at 50°C followed by a step for reverse transcriptase inactivation and *Taq*-DNA polymerase activation at 95°C for 15 min. All RT-PCR programs finished with a final elongation step at 72°C. This step was elongated to 30 min to prevent the formation of DNA double bands during DGGE analysis [1].

| <b>Target group</b>  | <b><i>Bacteria</i></b>                                 | <b><i>Betaproteobacteria</i></b>                          | <b><i>Actinobacteria</i></b>                           | <b><i>Sphingomonadaceae</i></b>                        |
|----------------------|--------------------------------------------------------|-----------------------------------------------------------|--------------------------------------------------------|--------------------------------------------------------|
| Primer-system        | GC-339F<br>907R                                        | GC-Beta359F<br>Beta680R                                   | GC-HGC236F<br>HGC664R                                  | Sphingo108F<br>ADF681R<br>Nested-PCR:<br>GC-339F/907R  |
| Fragment length (nt) | 588 (+40)                                              | 336 (+40)                                                 | 428 (+40)                                              | 871<br>Nested-PCR: 588 (+40)                           |
| PCR cycles           | 94°C 30 sec<br>55°C 30 sec<br>72°C 40 sec<br>28 cycles | 94°C 30 sec<br>52°C 30 sec<br>72°C 35 sec<br>28-30 cycles | 94°C 30 sec<br>52°C 30 sec<br>72°C 35 sec<br>28 cycles | 94°C 30 sec<br>55°C 40 sec<br>72°C 54 sec<br>28 cycles |

## Reference

1. Janse I, Bok J, Zwart G (2004) A simple remedy against artifactual double bands in denaturing gradient gel electrophoresis. *J Microbiol Met* 57: 279-281.
