# Supplementary material for: Contrasting Effects of Singlet Oxygen and Hydrogen Peroxide on Bacterial Community Composition in a Humic Lake
Source: PubMed Central journal article supplement (PMC3965437; doi:10.1371/journal.pone.0092518), 2014-03-25
Supplement: pone.0092518.s015.pdf [file pone.0092518.s015.pdf]

**Table S6**

Phylogenetic affiliation of 16S rRNA gene sequences representing DGGE bands. Phylogenetic assignments of 16S rRNA gene sequences were performed by using the RDP II Classifier [1] and BLAST [2]. DGGE bands were derived from DGGE patterns generated with *Bacteria* (**EUB**), *Betaproteobacteria* (**Beta**), *Actinobacteria* (**Actino**), or *Sphingomonadaceae* (**SPH**)-specific 16S rRNA gene targeting primer-systems. SW: South-West basin of Lake Grosse Fuchskuhle; **06**, **08**, or **09**: experiments in 2006, 2008, and 2009. Sequence names correspond to those shown in the phylogenetic trees of Fig. 5-9 and the numbers within the sequence names correspond to numbers next to DNA bands in the respective DGGE gels.

| Sequence Name | Acc. No. | nt  | RDP classifier                                                                                                    | Closest related BLAST hit |          |                                                                                 |
|---------------|----------|-----|-------------------------------------------------------------------------------------------------------------------|---------------------------|----------|---------------------------------------------------------------------------------|
|               |          |     |                                                                                                                   | Similarity (%)            | Acc.     | Sequence name                                                                   |
| EUB-SW06-1    | JF917134 | 365 | <i>"Chlorobi"[100%] "Chlorobia"[100%]<br/>Chlorobiales[100%] Chlorobiaceae[100%]<br/>Chlorobium[100%]</i>         | 100%                      | GU734037 | Lake Grosse Fuchskuhle DGGE band FSW-St05-2                                     |
|               |          |     |                                                                                                                   | 99%                       | CP001110 | <i>Pelodictyon phaeoclathratiforme</i> BU-1                                     |
| EUB-SW06-2    | JF917135 | 374 | <i>Alphaproteobacteria[95%] Rhizobiales[46%]</i>                                                                  | 100%                      | HQ420131 | Acidic cole mine drainage clone LRE22B42                                        |
|               |          |     |                                                                                                                   | 95%                       | EF667926 | Uncultured alpha proteobacterium clone Hv(lakePohlsee)_38                       |
| EUB-SW06-3    | JF917136 | 388 | <i>Gammaproteobacteria[100%]<br/>Oceanospirillales[47%] Oleiphilaceae[42%]<br/>Oleiphilus[42%]</i>                | 99%                       | GU734062 | Lake Grosse Fuchskuhle DGGE band FSW-St06-11                                    |
|               |          |     |                                                                                                                   | 93%                       | AE017282 | <i>Methylococcus capsulatus</i> Bath                                            |
| EUB-SW06-4    | JF917137 | 452 | <i>Alphaproteobacteria[100%]<br/>Sphingomonadales[100%]<br/>Sphingomonadaceae[100%]<br/>Novosphingobium[100%]</i> | 99%                       | EU336977 | <i>N. acidiphilum</i> FSW06-204d <sup>T</sup>                                   |
| EUB-SW09-5    | JF917138 | 408 | <i>Cyanobacteria[100%]<br/>Cyanobacteria[100%] Chloroplast[100%]<br/>Chlorophyta[100%]</i>                        | 100%                      | EU442895 | Nam Co Lake clone N06Jun-31                                                     |
| EUB-SW09-6    | JF917139 | 505 | <i>Alphaproteobacteria[99%] Rhizobiales[61%]<br/>Bradyrhizobiaceae[20%] Balneimonas[19%]</i>                      | 95%                       | EF667926 | Lake Pohlsee clone Hv(lakePohlsee)_38                                           |
| EUB-SW09-7    | JF917140 | 367 | <i>Firmicutes"[100%] "Bacilli"[98%]<br/>Bacillales[98%] "Paenibacillaceae"[87%]<br/>Paenibacillus[87%]</i>        | 100%                      | GU734065 | Acidic mining lake DGGE band B3<br>Lake Grosse Fuchskuhle DGGE band FSW-St06-14 |
| EUB-SW09-8    | JF917141 | 532 | <i>Firmicutes"[100%] "Bacilli"[100%]<br/>Bacillales[100%] "Paenibacillaceae"[89%]<br/>Paenibacillus[88]</i>       | 99%                       | GU734065 | Lake Grosse Fuchskuhle DGGE band FSW-St06-14                                    |
| EUB-SW09-9    | JF917142 | 505 | <i>Alphaproteobacteria[100%]</i>                                                                                  | 98%                       | EF520395 | Adirondack lake clone ADK-BTe02-51                                              |

|              |          |     |                                                                                                                                                                                                                           |                    |                                  |                                                                                                                                        |
|--------------|----------|-----|---------------------------------------------------------------------------------------------------------------------------------------------------------------------------------------------------------------------------|--------------------|----------------------------------|----------------------------------------------------------------------------------------------------------------------------------------|
| EUB-SW09-10  | JF917143 | 530 | <i>Caulobacterales</i> [100%] <i>Caulobacteraceae</i> [100%]<br><i>Phenylobacterium</i> [86%]<br><i>Betaproteobacteria</i> [100%]<br><i>Burkholderiales</i> [100%] <i>Comamonadaceae</i> [98%]<br><i>Acidovorax</i> [34%] | 99%                | GU734044<br>DQ501302             | Lake Grosse Fuchskuhle DGGE band FSW-St05-9<br>Lake Grosse Fuchskuhle clone FNE11-10                                                   |
| Beta-SW06-1  | JF917144 | 285 | <i>Betaproteobacteria</i> [100%]<br><i>Burkholderiales</i> [100%] <i>Comamonadaceae</i> [98%]<br><i>Simplicispira</i> [58%]                                                                                               | 100%<br>99%<br>95% | GU734058<br>EF520440<br>AF435948 | Lake Grosse Fuchskuhle DGGE band FSW-St06-7<br>Adirondack Lake clone ADK-BMe02-21<br><i>Rhodoferax ferrireducens</i> T118 <sup>T</sup> |
| Beta-SW06-2  | JF917145 | 287 | <i>Betaproteobacteria</i> [100%]<br><i>Burkholderiales</i> [100%] <i>Burkholderiaceae</i> [100%]<br><i>Polynucleobacter</i> [100%]                                                                                        | 100%               | AJ879783                         | <i>P. necessarius</i> ssp. <i>asymbioticus</i> QLW-P1DMWA-1 <sup>T</sup>                                                               |
| Beta-SW06-3  | JF917146 | 279 | <i>Betaproteobacteria</i> [100%]<br><i>Burkholderiales</i> [100%]<br><i>Comamonadaceae</i> [100%] <i>Simplicispira</i> [14%]                                                                                              | 100%<br>99%<br>96% | GU734044<br>DQ501302<br>AF285414 | Lake Grosse Fuchskuhle DGGE band FSW-St05-9<br>Lake Grosse Fuchskuhle clone FNE11-10<br><i>Xenophilus azovorans</i> KF46F <sup>T</sup> |
| Beta-SW06-4  | JF917147 | 276 | <i>Betaproteobacteria</i> [100%]<br><i>Methylophilales</i> [100%] <i>Methylophilaceae</i> [100%]<br><i>Methylophilus</i> [99%]                                                                                            | 99%<br>96%         | GU734054<br>GQ175365             | Lake Grosse Fuchskuhle DGGE band FSW06-St06-3<br><i>Methylophilus</i> sp. Tobacco-planted soil isolate CS3                             |
| Beta-SW06-5  | JF917148 | 281 | <i>Betaproteobacteria</i> [100%]<br><i>Burkholderiales</i> [100%]<br><i>Comamonadaceae</i> [100%] <i>Curvibacter</i> [56%]                                                                                                | 99%<br>96%         | GU734088<br>AB109889             | Lake Grosse Fuchskuhle DGGE band FSW06-Lt06-1<br><i>Curvibacter gracilis</i> 7-1 <sup>T</sup>                                          |
| Beta-SW06-6  | JF925282 | 173 | <i>Betaproteobacteria</i> [100%]<br><i>Burkholderiales</i> [100%] <i>Burkholderiaceae</i> [100%]<br><i>Polynucleobacter</i> [100%]                                                                                        | 100%               | AJ879783<br>GU734064             | <i>P. necessarius</i> ssp. <i>asymbioticus</i> QLW-P1DMWA-1 <sup>T</sup><br>Lake Grosse Fuchskuhle DGGE band FSW-St06-13               |
| Beta-SW08-7  | JF917149 | 277 | <i>Betaproteobacteria</i> [100%]<br><i>Burkholderiales</i> [100%] <i>Burkholderiaceae</i> [54%]<br><i>Polynucleobacter</i> [54%]                                                                                          | 99%<br>98%         | HM128455<br>FM208182             | Tanggulha Lake clone SINN1071<br><i>Polynucleobacter rarus</i> MT-CBb6A5 <sup>T</sup>                                                  |
| Beta-SW08-8  | JF917150 | 285 | <i>Betaproteobacteria</i> [100%]<br><i>Burkholderiales</i> [99%] <i>Comamonadaceae</i> [99%]<br><i>Simplicispira</i> [45%]                                                                                                | 100%<br>99%<br>95% | GU734058<br>EF520440<br>AF435948 | Lake Grosse Fuchskuhle DGGE band FSW-St06-7<br>Adirondack Lake clone ADK-BMe02-21<br><i>Rhodoferax ferrireducens</i> T118 <sup>T</sup> |
| Beta-SW08-9  | JF917151 | 279 | <i>Betaproteobacteria</i> [100%]<br><i>Burkholderiales</i> [100%] <i>Comamonadaceae</i> [99%]<br><i>Simplicispira</i> [24%]                                                                                               | 100%<br>99%<br>96% | GU734044<br>DQ501302<br>AF285414 | Lake Grosse Fuchskuhle DGGE band FSW-St05-9<br>Lake Grosse Fuchskuhle clone FNE11-10<br><i>Xenophilus azovorans</i> KF46F <sup>T</sup> |
| Beta-SW09-10 | JF917152 | 292 | <i>Betaproteobacteria</i> [100%]<br><i>Burkholderiales</i> [100%]<br><i>Comamonadaceae</i> [100%] <i>Simplicispira</i> [61%]                                                                                              | 100%<br>99%<br>95% | GU734058<br>EF520440<br>AF435948 | Lake Grosse Fuchskuhle DGGE band FSW-St06-7<br>Adirondack Lake clone ADK-BMe02-21<br><i>Rhodoferax ferrireducens</i> T118 <sup>T</sup> |
| Beta-SW09-11 | JF917153 | 271 | <i>Betaproteobacteria</i> [100%]<br><i>Burkholderiales</i> [100%] <i>Burkholderiaceae</i> [100%]<br><i>Polynucleobacter</i> [100%]                                                                                        | 100%               | AJ879783                         | <i>P. necessarius</i> ssp. <i>asymbioticus</i> QLW-P1DMWA-1 <sup>T</sup>                                                               |

|                |          |     |                                                                                                                                                                                                                  |             |                      |                                                                                                 |
|----------------|----------|-----|------------------------------------------------------------------------------------------------------------------------------------------------------------------------------------------------------------------|-------------|----------------------|-------------------------------------------------------------------------------------------------|
| Actino-SW06-1  | JF917154 | 421 | <i>Actinobacteria</i> [92%] <i>Actinobacteridae</i> [89%]<br><i>Actinomycetales</i> [85%] <i>Micrococcineae</i> [47%]<br><i>Intrasporangiaceae</i> [26%] <i>Intrasporangium</i> [6%]                             | 99%         | DQ316352             | Lake Grosse Fuchskuhle clone FSW11-20                                                           |
| Actino-SW06-2  | JF917155 | 421 | <i>Actinobacteria</i> [99%] <i>Actinobacteridae</i> [97%]<br><i>Actinomycetales</i> [90%] <i>Micrococcineae</i> [52%]<br><i>Intrasporangiaceae</i> [32%] <i>Terracoccus</i> [5%]                                 | 100%<br>99% | EU117631<br>DQ316352 | Crystal Bog Lake clone CB7B1<br>Lake Grosse Fuchskuhle clone FSW11-20                           |
| Actino-SW06-3  | JF917156 | 402 | <i>Verrucomicrobia</i> "[100%] <i>Subdivision3</i> [100%]<br><i>Subdivision3_genera_incertae_sedis</i> [100%]                                                                                                    | 98%         | AY792311             | Crystal Bog Lake clone CystalBoq022E6                                                           |
| Actino-SW06-4  | JF917157 | 388 | <i>Actinobacteria</i> "[94%] <i>Actinobacteria</i> [94%]<br><i>Actinobacteridae</i> [88%] <i>Actinomycetales</i> [86%]<br><i>Micrococcineae</i> [49%] <i>Intrasporangiaceae</i> [30%]<br><i>Terracoccus</i> [6%] | 100%<br>99% | HQ532266<br>DQ316348 | Crystal Bog Lake clone CB3D11<br>Lake Grosse Fuchskuhle clone FSW11-16                          |
| Actino-SW06-5  | JF917158 | 402 | <i>"Verrucomicrobia"</i> [100%] <i>Subdivision3</i> [100%]<br><i>Subdivision3_genera_incertae_sedis</i> [100%]                                                                                                   | 98%         | FJ624906             | Boreal pine forest clone HF_C_33                                                                |
| Actino-SW06-6  | JF917159 | 400 | <i>Verrucomicrobia</i> "[100%] <i>Subdivision3</i> [100%]<br><i>Subdivision3_genera_incertae_sedis</i> [100%]                                                                                                    | 99%         | AY792311             | Crystal Bog Lake clone CystalBoq022E6                                                           |
| Actino-SW06-7  | JF917160 | 419 | <i>"Verrucomicrobia"</i> [100%] <i>Spartobacteria</i> [98%]<br><i>Spartobacteria_genera_incertae_sedis</i> [96%]                                                                                                 | 97%         | FJ916701             | Twin Valley Lake clone TW1A5                                                                    |
| Actino-SW08-8  | JF917161 | 380 | <i>Actinobacteria</i> [100%] <i>Actinobacteridae</i> [100%]<br><i>Actinomycetales</i> [100%]<br><i>Corynebacterineae</i> [100%]<br><i>Mycobacteriaceae</i> [100%] <i>Mycobacterium</i> [100%]                    | 100%<br>98% | FJ544445<br>AY208856 | <i>Mycobacterium</i> sp. S061<br><i>Mycobacterium saskatchewanense</i> NRCM 00-250 <sup>T</sup> |
| Actino-SW08-9  | JF917162 | 414 | <i>"Verrucomicrobia"</i> [100%] <i>Subdivision3</i> [100%]<br><i>Subdivision3_genera_incertae_sedis</i> [100%]                                                                                                   | 98%         | AY792311             | Crystal Bog Lake clone CystalBoq022E6                                                           |
| Actino-SW08-10 | JF917163 | 414 | <i>"Verrucomicrobia"</i> [100%] <i>Subdivision3</i> [100%]<br><i>Subdivision3_genera_incertae_sedis</i> [100%]                                                                                                   | 98%<br>97%  | HQ162248<br>AY792311 | Arctic peat soil clone Jun20<br>Crystal Bog Lake clone CystalBoq022E6                           |
| Actino-SW08-11 | JF917164 | 402 | <i>"Verrucomicrobia"</i> [100%] <i>Subdivision3</i> [100%]<br><i>Subdivision3_genera_incertae_sedis</i> [100%]                                                                                                   | 98%         | AY792311             | Crystal Bog Lake clone CystalBoq022E6                                                           |
| SPH-SW06-1     | JF917165 | 508 | <i>Alphaproteobacteria</i> [100%]<br><i>Rhodospirillales</i> [100%]<br><i>Acetobacteraceae</i> [100%] <i>Kozakia</i> [24%]                                                                                       | 99%         | GU734042             | Lake Grosse Fuchskuhle DGGE bands FSW-St05-7                                                    |
| SPH-SW08-2     | JF917166 | 505 | <i>Alphaproteobacteria</i> [100%]<br><i>Rhodospirillales</i> [100%]<br><i>Rhodospirillaceae</i> [100%]<br><i>Telmatospirillum</i> [100%]                                                                         | 99%<br>97%  | GQ402757<br>AF524863 | Peat swamp forest soil clone clone PW351<br><i>Telmatospirillum siberiense</i> 26-4b1           |
| SPH-SW08-3     | JF917167 | 505 | <i>Alphaproteobacteria</i> [100%]<br><i>Rhodospirillales</i> [100%] <i>Rhodospirillaceae</i> [98%]<br><i>Skermanella</i> [81%]                                                                                   | 94%         | GU256437             | <i>Azospirillum amazonense</i> DSM 2787 <sup>T</sup>                                            |
| SPH-SW08-4     | JF917168 | 505 | <i>Alphaproteobacteria</i> [100%]<br><i>Sphingomonadales</i> [100%]                                                                                                                                              | 99%         | EU336977             | <i>N. acidiphilum</i> FSW06-204d <sup>T</sup>                                                   |

|             |          |     |                                                                                                                                                                                                             |            |                      |                                                                                                      |
|-------------|----------|-----|-------------------------------------------------------------------------------------------------------------------------------------------------------------------------------------------------------------|------------|----------------------|------------------------------------------------------------------------------------------------------|
| SPH-SW08-5  | JF917169 | 505 | <i>Sphingomonadaceae</i> [100%]<br><i>Novosphingobium</i> [100%]<br><i>Alphaproteobacteria</i> [100%]<br><i>Rhodospirillales</i> [100%]<br><i>Rhodospirillaceae</i> [100%]<br><i>Telmatospirillum</i> [99%] | 96%        | AF524863             | <i>Telmatospirillum siberiense</i> 26-4b1                                                            |
| SPH-SW08-6  | JF917170 | 503 | <i>Alphaproteobacteria</i> [100%]<br><i>Rhodospirillales</i> [98%] <i>Rhodospirillaceae</i> [78%]<br><i>Rhodocista</i> [33%]                                                                                | 99%<br>94% | EU409478<br>GU256437 | Lake Grosse Fuchskuhle isolate Fuku2-ISO-153<br><i>Azospirillum amazonense</i> DSM 2787 <sup>T</sup> |
| SPH-SW08-7  | JF917171 | 506 | <i>Alphaproteobacteria</i> [100%]<br><i>Rhodospirillales</i> [100%] <i>Rhodospirillaceae</i> [99%]<br><i>Skermanella</i> [77%]                                                                              | 94%        | GU256437             | <i>Azospirillum amazonense</i> DSM 2787 <sup>T</sup>                                                 |
| SPH-SW09-8  | JF917172 | 505 | <i>Alphaproteobacteria</i> [100%]<br><i>Rhodospirillales</i> [100%]<br><i>Rhodospirillaceae</i> [100%]<br><i>Telmatospirillum</i> [100%]                                                                    | 99%<br>97% | GQ402757<br>AF524863 | Peat swamp forest soil clone clone PW351<br><i>Telmatospirillum siberiense</i> 26-4b1                |
| SPH-SW09-9  | JF917173 | 505 | <i>Alphaproteobacteria</i> [100%]<br><i>Rhodospirillales</i> [100%] <i>Rhodospirillaceae</i> [99%]<br><i>Skermanella</i> [79%]                                                                              | 95%        | GU256437             | <i>Azospirillum amazonense</i> DSM 2787 <sup>T</sup>                                                 |
| SPH-SW08-10 | JF917174 | 503 | <i>Alphaproteobacteria</i> [100%]<br><i>Rhodospirillales</i> [100%]<br><i>Rhodospirillaceae</i> [100%]<br><i>Telmatospirillum</i> [98%]                                                                     | 99%<br>97% | GQ402757<br>AF524863 | Peat swamp forest soil clone PW351<br><i>Telmatospirillum siberiense</i> 26-4b1                      |
| SPH-SW09-11 | JF917175 | 495 | <i>Gammaproteobacteria</i> [99%]<br><i>Methylococcales</i> [96%] <i>Methylococcaceae</i> [96%]<br><i>Methylobacter</i> [87%]                                                                                | 94%<br>93% | AJ290055             | <i>Methylobacter</i><br>Lake Grosse Fuchskuhle clone Fuku N33                                        |
| SPH-SW09-12 | JF917176 | 506 | <i>Alphaproteobacteria</i> [100%]<br><i>Sphingomonadales</i> [100%]<br><i>Sphingomonadaceae</i> [100%]<br><i>Novosphingobium</i> [100%]                                                                     | 99%        | EU336977             | <i>N. acidiphilum</i> FSW06-204d <sup>T</sup>                                                        |
| SPH-SW09-13 | JF917177 | 498 | <i>Alphaproteobacteria</i> [100%]<br><i>Sphingomonadales</i> [100%]<br><i>Sphingomonadaceae</i> [99%]<br><i>Novosphingobium</i> [98%]                                                                       | 99%        | EU336977             | <i>N. acidiphilum</i> FSW06-204d <sup>T</sup>                                                        |
| SPH-SW09-14 | JF917178 | 506 | <i>Alphaproteobacteria</i> [100%]<br><i>Rhodospirillales</i> [99%] <i>Rhodospirillaceae</i> [90%]<br><i>Rhodocista</i> [38%]                                                                                | 99%<br>94% | EU409478<br>GU25643  | Lake Grosse Fuchskuhle isolate Fuku2-ISO-153<br><i>Azospirillum amazonense</i> DSM 2787 <sup>T</sup> |
| SPH-SW09-15 | JF917179 | 530 | <i>Gammaproteobacteria</i> [100%]<br><i>Methylococcales</i> [100%]<br><i>Methylococcaceae</i> [100%] <i>Methylobacter</i> [100%]                                                                            | 95%        | AJ290055             | Lake Grosse Fuchskuhle clone FukuN13                                                                 |

|             |          |     |                                                                                                                                        |            |                      |                                                                                                      |
|-------------|----------|-----|----------------------------------------------------------------------------------------------------------------------------------------|------------|----------------------|------------------------------------------------------------------------------------------------------|
| SPH-SW09-16 | JF917180 | 506 | <i>Alphaproteobacteria</i> [100%]<br><i>Sphingomonadales</i> [100%]<br><i>Sphingomonadaceae</i> [100%]<br><i>Novosphingobium</i> [99%] | 99%        | EU336977             | <i>N. acidiphilum</i> FSW06-204d <sup>T</sup>                                                        |
| SPH-SW09-17 | JF917181 | 506 | <i>Alphaproteobacteria</i> [100%]<br><i>Sphingomonadales</i> [100%]<br><i>Sphingomonadaceae</i> [100%]<br><i>Novosphingobium</i> [99%] | 99%        | EU336977             | <i>N. acidiphilum</i> FSW06-204d <sup>T</sup>                                                        |
| SPH-SW09-18 | JF917182 | 506 | <i>Alphaproteobacteria</i> [100%]<br><i>Rhodospirillales</i> [99%]<br><i>Rhodospirillaceae</i> [92%]<br><i>Rhodocista</i> [30%]        | 99%<br>94% | EU409478<br>GU256437 | Lake Grosse Fuchskuhle isolate Fuku2-ISO-153<br><i>Azospirillum amazonense</i> DSM 2787 <sup>T</sup> |

## Reference

1. Wang Q, Garrity GM, Tiedje JM, Cole JR (2007) Naive Bayesian classifier for rapid assignment of rRNA sequences into the new bacterial taxonomy. *Appl Environ Microbiol* 73: 5261-5267.
2. Altschul SF, Gish W, Miller W, Myers EW, Lipman DJ (1990) Basic local alignment search tool. *J Mol Biol* 215: 403-410.
