# Supplementary material for: Contrasting Effects of Singlet Oxygen and Hydrogen Peroxide on Bacterial Community Composition in a Humic Lake
Source: PubMed Central journal article supplement (PMC3965437; doi:10.1371/journal.pone.0092518), 2014-03-25
Supplement: pone.0092518.s016.pdf [file pone.0092518.s016.pdf]

1  
2  
3  
4  
5  
6  
7  
8  
9  
10  
11  
12  
13  
14  
15  
16  
17  
18  
19  
20  
21  
22  
23  
24  
25  
26

**Supporting material**

**Contrasting effects of singlet oxygen and hydrogen peroxide on bacterial community composition in a humic lake**

Stefanie P. Glaeser, Bork A. Berghoff, Verena Stratman, Hans-Peter Grossart,  
and Jens Glaeser

**Supplementary Methods and Results**

**Characterization of water sample photo-reactivity**

*NOM characteristics of SW basin samples*

The chemical characteristics of natural organic matter (NOM) in a lake largely depend on the trophic status and the catchment area features. NOM characteristics change over time and during seasons, which may strongly affect bacterial community composition (BCC). Especially in the upper, illuminated water layers, photochemical reactions generate toxic compounds including reactive oxygen species (ROS) [1,2,3,4]. In order to compare NOM concentrations and reactivity between experimental periods, water samples were obtained on 2<sup>nd</sup> July 2006, 5<sup>th</sup> September 2008, and 14<sup>th</sup> August 2009.

The reactivity of NOM between experiments was compared by using 0.22 µm filtered lake water samples that were stored at -20°C directly after sampling. Values for the specific UVA absorbance at 254 nm (SUVA<sub>254</sub>) were determined according to [5] by using a Specord

27 50 UV-VIS spectral photometer (Analytic Jena, Germany). Total organic carbon (TOC)  
28 analysis was performed with a LiquiTOC DOC Analyser (Elementar Analysensysteme,  
29 Germany). NOM concentrations were different on the respective experiment days as indicated  
30 by values of 23.3, 34.0, and 28.4 mg C L<sup>-1</sup> in 2006, 2008, and 2009 (Table S1). Respective  
31 SUVA<sub>254</sub> values of 3.3, 3.7, and 4.3 reflect the specific UV absorbance of NOM at 254 nm and  
32 indicate that chemical signature was different between samples (Table S1). Hence reactivity of  
33 SW basin water samples may have changed between experiments. Since a direct correlation of  
34 SUVA<sub>254</sub> values, which indicates the specific UV absorbance and photo-reactivity could not be  
35 established [5], formation of <sup>1</sup>O<sub>2</sub> and H<sub>2</sub>O<sub>2</sub> were determined experimentally.

36

### 37 *Comparison of water sample photo-reactivity*

38 A direct comparison of ROS formation by artificial irradiation of NOM in water samples was  
39 performed with 50 W m<sup>-2</sup> of UV-A and 1 W m<sup>-2</sup> UV-B (Helarium B1-12-40W, Wolff System,  
40 Stuttgart, Germany). This UV light intensity was ~2-fold higher than the maximum natural UV  
41 radiation on a bright summer day at the lake site. UV-A and UV-B light intensities were  
42 measured by using respective UV Sensors (Type 2.3 and Type 1.3 for UV-A and UV-B,  
43 respectively, Indium Sensors, Neuenhagen, Germany) and a data-logger (LI-1400, LI-COR,  
44 Bad Homburg, Germany). Singlet oxygen steady state concentrations were determined  
45 according to the method of [6] as described recently [7]. For H<sub>2</sub>O<sub>2</sub> concentrations the method  
46 described by [8] was used with slight modifications: 300 μL of 0.22 μm filtered water samples  
47 were mixed with 9 μL freshly prepared Amplex Red Assay consisting of 100 μL distilled water  
48 and 200 μL Horseradish peroxidase (Sigma Aldrich, Seelze, Hannover; 50 U mL<sup>-1</sup> in 250 mM  
49 Tris-HCl, pH7.2), and 2.5 μL Amplex Red (Sigma Aldrich, 1.25 mg mL<sup>-1</sup> in DMSO).  
50 Fluorescence was measured in a SFM 25 fluorimeter (Kontron, Eiching, Germany) with  
51 excitation set to 570 nm and emission to 585 nm. Alternatively, the Infinite 200 microtiter plate

52 reader (Tecan, Männedorf, Switzerland) was used. Blanks were prepared by adding 10 U of  
53 catalase (Sigma Aldrich).

54 Singlet oxygen steady state concentrations were increased by 1.12 and 1.24-fold in  
55 samples from 2008 and 2009 compared to that from 2006. In a similar manner, H<sub>2</sub>O<sub>2</sub> formation  
56 increased by 1.5 and 4.5-fold, respectively (Table S1). Normalization to DOC concentrations  
57 showed that [<sup>1</sup>O<sub>2</sub>]<sub>SS</sub> ranged between 0.55 and 0.73 × 10<sup>-14</sup> M per mg DOC L<sup>-1</sup>. In contrast, the  
58 rate of H<sub>2</sub>O<sub>2</sub> formation increased from 0.23 to 1.04 μM per mg DOC L<sup>-1</sup> (Table S1). Changes  
59 in <sup>1</sup>O<sub>2</sub> and H<sub>2</sub>O<sub>2</sub> formation were not correlated. Therefore, we conclude that different chemical  
60 signatures of NOM may have caused differences in <sup>1</sup>O<sub>2</sub> and H<sub>2</sub>O<sub>2</sub> formation. Recently  
61 published experiments also indicate a limited correlation between <sup>1</sup>O<sub>2</sub> and H<sub>2</sub>O<sub>2</sub> formation from  
62 DOM [9]. The formation of <sup>1</sup>O<sub>2</sub> was not affected by the addition of 10 μM H<sub>2</sub>O<sub>2</sub> to 0.22 μm  
63 filtered SW basin water samples in 2006 (data not shown). The ratio of H<sub>2</sub>O<sub>2</sub> generation rate  
64 and [<sup>1</sup>O<sub>2</sub>]<sub>SS</sub> determined from UV irradiation experiments was similar in 2006 and 2008, but  
65 increased by 2.7 to 3.6-fold in 2009 (Table S1). This clearly indicates that the rate of formation  
66 of individual ROS largely depends on the time of sampling and the chemical signature of the  
67 NOM present in the lake.

68

#### 69 *In situ H<sub>2</sub>O<sub>2</sub> formation and decay*

70 *In situ* H<sub>2</sub>O<sub>2</sub> formation and decay deserved more attention, because H<sub>2</sub>O<sub>2</sub> concentrations were  
71 low compared to similar boreal lakes [10]. In 2006, a decay of 0.68 and 0.28 μM H<sub>2</sub>O<sub>2</sub> h<sup>-1</sup> was  
72 observed for unfiltered and 0.22 μm filtered surface water samples, respectively. In order to  
73 analyse abiotic *in situ* H<sub>2</sub>O<sub>2</sub> formation rates, 0.22 μm filtered water samples with completely  
74 decayed H<sub>2</sub>O<sub>2</sub> were used. In these samples, a rate of 0.44 μM H<sub>2</sub>O<sub>2</sub> h<sup>-1</sup> was observed during  
75 incubation in the surface water layer at ~800 W m<sup>-2</sup> of sunlight intensity. These findings  
76 indicate that H<sub>2</sub>O<sub>2</sub> generation and degradation is nearly balanced in the SW basin surface water.

77 The use of fresh water samples in 2008 further revealed a rather high H<sub>2</sub>O<sub>2</sub> degradation  
78 capacity even in the absence of bacteria. Water samples were 0.22 µm filtered directly after  
79 sampling and immediately exposed to sunlight in Whirl-Pak bags. Formation of H<sub>2</sub>O<sub>2</sub> was only  
80 detected at a light dose of >300 to 400 W m<sup>-2</sup> (Fig. S1). This indicates a high H<sub>2</sub>O<sub>2</sub> degradation  
81 capacity which is not directly linked to the activity of bacterial cells.

82

### 83 *Potential photochemical effects of unbleached material from the acidic fen area*

84 Reactivity of NOM in the SW basin is strongly affected by the entry of unbleached NOM from  
85 the adjacent fen located in the catchment area next to the SW basin of Lake Grosse Fuchskuhle  
86 [11]. To test this hypothesis, ROS formation was investigated in 0.22 µm filtered water  
87 samples obtained from plastic tubes inserted in the fen area [12]. This unbleached NOM  
88 generated 2 to 8-fold more H<sub>2</sub>O<sub>2</sub> per mg DOC upon UV-A/B irradiation but similar [<sup>1</sup>O<sub>2</sub>]<sub>ss</sub>  
89 concentrations were observed (Table S1). Our results indicate that changes of NOM  
90 characteristics due to the entry of unbleached NOM from the fen area strongly affect H<sub>2</sub>O<sub>2</sub>  
91 formation, but only weakly that of [<sup>1</sup>O<sub>2</sub>]<sub>ss</sub> concentrations. Diurnal values for rainfall and global  
92 radiation were plotted for 30 days preceding the respective experiments of 2006, 2008, and  
93 2009 (Fig. S9). However, kinetics of rainfall and global radiation and also the total cumulative  
94 amounts of rainfall and radiation for up to 30 days preceding the experiments cannot explain  
95 differences in NOM reactivity. Hence, the impact of increased run-off of NOM from the  
96 adjacent fen into the SW basin or, in contrast, the prolonged duration of NOM bleaching on the  
97 formation of <sup>1</sup>O<sub>2</sub> and H<sub>2</sub>O<sub>2</sub> in the SW basin needs to be assessed in greater detail in the future.

98

### 99 **Investigation of bacterial community composition by 16S rRNA (gene) based methods**

#### 100 *Differences in experimental procedures*

101 The experimental set ups varied slightly between the individual experiments. However, in all  
102 three experiments the same controls were performed and all data are expressed with reference

103 to the internal controls. The internal controls included dark incubations of water samples with  
104 and without the  $^1\text{O}_2$  photosensitizer Rose Bengal and addition of  $\text{H}_2\text{O}_2$  solution, as well as light  
105 exposure without addition of ROS generating chemicals.

106 The pore size of filter membranes had to be changed after a pilot phase in 2005 and  
107 2006 for technical reasons: serial filtration by using a  $5\mu\text{m}$  pore size syringe disk filter  
108 connected to a Sterivex cartridge with  $0.2\mu\text{m}$  pore size saved valuable time for sampling during  
109 the experiments. Microscopic inspection of the samples by filtration on  $0.22\mu\text{m}$  membrane  
110 filters followed by Sybr Green I staining, indicated that free-living bacteria were smaller than  $1$   
111  $\mu\text{m}$  and that particles were mostly larger than  $20\mu\text{m}$ . Therefore, the same particles should have  
112 been reliably separated from the free-living size fraction irrespective whether filter pore size  
113 was  $8$  or  $5\mu\text{m}$  for serial filtration. This is supported by the very similar DGGE pattern of the  
114 free-living fraction in 2006, 2008, and 2009 (Fig. 10 and 11). Also, in all three experiments  
115 DGGE patterns of the particle attached fraction clearly differed from those of the free-living  
116 fraction (Fig. 10). Therefore, we are confident that the slight changes in filter pore sizes did  
117 not significantly affect the fractionation in our study.

118 Exclusion of UV light was performed in a larger experimental set up to verify the  
119 previous finding that UV light does not strongly affect formation of ROS in Lake Grosse  
120 Fuchskuhle. UV light is absorbed within the first few cm in the water column and does not  
121 reach the Whirl-Pak bags incubated at  $10\text{ cm}$  (data not shown). The transmission spectra for the  
122 Whirl-Pak bags are shown in Fig. S7, which indicate that PP and PE bags do not severely  
123 absorb UV light and that the UV block sheet screened UVA and -B light, but no visible light.

124 Because all controls were performed for each experiment and relative changes in  $^1\text{O}_2$   
125 and  $\text{H}_2\text{O}_2$  were analyzed with reference to the controls, slight variations in the experimental set  
126 up are considered by the overall experimental design.

127

128

129 *Generation and screening of 16S rRNA gene clone libraries*

130 Nearly full-length 16S rRNA gene clone libraries were generated for selected treatments with  
131 *Bacteria* primers 8F (5'-AGAGTTTGATCMTGGCTCAG-3') and 1492R (5'-  
132 GGYTACCTTGTACGACTT-3') [13]. PCRs were performed in triplicates in total volumes  
133 of 20  $\mu\text{l}$  containing 2  $\mu\text{L}$  1:10 diluted DNA, 1  $\times$  PCR-Buffer, 400  $\mu\text{M}$  dNTPs-Mix (Fermentas,  
134 St. Leon-Rot, Germany), 0.5  $\mu\text{M}$  of each primer, 0.4  $\mu\text{g } \mu\text{L}^{-1}$  BSA (Fermentas), and 0.02 U  $\mu\text{L}^{-1}$   
135 <sup>1</sup> *Taq* DNA polymerase (Qiagen, Hilden, Germany). BSA was added to minimize the inhibition  
136 by co-extracted humic substances. PCR amplifications were performed in a Primus 96 Plus  
137 cyclor (MWG, Ebersberg, Germany) as followed: 95°C for 3 min, 32 cycles of 94°C for 45 sec,  
138 54°C for 45 sec, and 68°C for 1 min 30 sec, and finally 68°C for 30 min to increase the T-  
139 overhang for TA-cloning. PCRs controlled by agarose-gelelectrophoresis were pooled and  
140 purified using a PCR purification kit (Qiagen) and cloned using the Qiagen PCR cloning kit as  
141 described by the manufacturer (Qiagen). Screening for positive clones was done by colony-  
142 PCR using plasmid primers M13R (5'-AACAGCTATGACCATG-3') and M13F (-20) (5'-  
143 GTAAAACGACGGCCAGT-3') in a total volume of 10  $\mu\text{L}$  including a colony of a clone, 1  $\times$   
144 PCR-buffer (Molzym, Bremen, Germany), 400  $\mu\text{M}$  dNTP-mix, 0.4  $\mu\text{M}$  of each primer, 0.4  $\mu\text{g}$   
145  $\mu\text{L}^{-1}$  BSA, and 0.02 U  $\mu\text{L}^{-1}$  Mol *Taq* DNA Polymerase (Molzym). PCR cycling conditions  
146 were: 95°C for 3 min, 28 cycles of 94°C for 30 sec, 55°C for 30 sec, and 68°C for 1 min 50  
147 sec, and finally 68°C for 15 min. PCR products were controlled by agarose-gelelectrophoresis  
148 and PCR with positive inserts were re-amplified by Nested-PCR with cloning primers 8F and  
149 1492R in a total volume of 15  $\mu\text{L}$  including 0.1  $\mu\text{L}$  colony-PCR. PCR and cycling conditions  
150 were slightly different as described above: without BSA, an annealing temperature of 54°C,  
151 and a primer extension time of 1 min and 30 sec. Thereafter, PCR products were controlled by  
152 agarose-gelelectrophoresis and 5  $\mu\text{l}$  of the PCR were either digested with the restriction  
153 enzymes HaeIII or RsaI (Fermentas) in a total volume of 10  $\mu\text{l}$  containing 0.1 U restriction  
154 enzyme and 1 $\times$  restriction buffer. Samples were digested for 3 h at 37°C. PCR amplifications

155 and restriction digestions were performed in a C1000™ Thermal Cycler (Bio-Rad, Munich,  
156 Germany) in 96-well microtiter plates. Restriction products were separated in 1.5% agarose  
157 gels in 1× TBE buffer for 2.5 h at 3.8 V cm<sup>-1</sup>. For comparison, the 100 bp DNA ladder plus  
158 (Fermentas) was loaded three times per gel. EtBr-stained gels were analysed with Gel Compare  
159 II version 4.5 (Applied Maths, Sint-Martens-Latem, Belgium) using the unweighted pair group  
160 method using arithmetic average (UPGMA) clustering based on the band-based Dice similarity  
161 matrix. Operational taxonomic units (OTUs) were defined as the combination of the restriction  
162 pattern of HaeIII and RsaI. Approximately 50 clones were investigated for each clone library.  
163 Representatives of all OTUs, which occurred more than once in a clone library, were  
164 sequenced by the Sanger method from colony-PCRs. Most abundant OTUs were sequenced  
165 with plasmid primers from the 5′ and 3′ ends, whereas less abundant OTUs were only  
166 sequenced with the cloning primer 8F. Furthermore, most abundant OTUs were sequenced  
167 from different treatments and years to ensure the sequence identity within an OTU. Sequences  
168 were processed manually based on electropherograms using MEGA 5 [14]. A first phylogenetic  
169 assignment was done using the RDP II Classifier [15] and BLAST [16]. Chimera checks were  
170 performed using the Pintail software [17] and all sequences (and as a consequence respective  
171 OTUs) with low pintail values were excluded from the analysis. The coverage of each clone  
172 library was determined with the equation  $C = (1-n/N) \times 100$ , where N represents the number of  
173 investigated clones and n the number of unique OTUs [18]. Rarefaction curves were generated  
174 with Analytic Rarefaction version 2.0 ([www.HuntMountainSoftware.com](http://www.HuntMountainSoftware.com)).

175

#### 176 *16S rRNA targeting reverse transcriptase (RT)-PCR DGGE analysis*

177 Changes in BCC of metabolically active *Bacteria* were investigated by 16S rRNA targeting  
178 RT-PCR DGGE analysis using primer-systems targeting *Bacteria* or specific bacterial groups  
179 (see below). All used primer-systems and respective amplification conditions are listed in Table  
180 S4. RT-PCR amplifications were performed using the QIAGEN OneStep RT-PCR Kit in a total

181 volume of 15  $\mu\text{L}$  including 1.5  $\mu\text{L}$  of 1:10 diluted RNA, 5 $\times$  QIAGEN OneStep RT-PCR buffer,  
182 400  $\mu\text{M}$  of each dNTP, 0.4  $\mu\text{M}$  of each primer, 0.4  $\mu\text{g } \mu\text{L}^{-1}$  BSA, and 0.6  $\mu\text{L}$  of the OneStep  
183 RT-PCR Enzyme Mix. Quantification of PCR products and DGGE analysis were performed as  
184 described previously [7], except DGGE gels were stained with EtBr.

185

#### 186 *Group-specific 16S rRNA targeting RT-PCR DGGE analysis*

187 We used group-specific RT-PCR DGGE analysis to investigate the effects of increased [ $^1\text{O}_2$ ]<sub>SS</sub>  
188 and  $\text{H}_2\text{O}_2$  concentrations on phylotype composition within abundant bacterial groups and  
189 focused on the investigation of *Actinobacteria*, *Betaproteobacteria*, and *Sphingomonadaceae*,  
190 the most dominant bacterial groups in the SW basin of Lake Grosse Fuchskuhle [19]. Primers  
191 used for this approach are listed in Table S4.

192 We tested three different *Betaproteobacteria*-specific primer-systems with respect to the  
193 amplification specificity and the separation potential of abundant *Betaproteobacteria*  
194 phlotypes on the DGGE gel: (i) Beta680F/GC-1055R, (ii) GC339F/Beta680R, and (iii) GC-  
195 Beta350F/Beta680R). *Betaproteobacteria* phlotypes observed by clone library analyses and  
196 *Betaproteobacteria* isolates of relevant groups determined in the SW basin (*Polynucleobacter*,  
197 *Limnohabitans*-related, *Herbaspirillum*) were used for the establishment of the  
198 *Betaproteobacteria*-specific primer-systems. The resolution power of the three different  
199 *Betaproteobacteria*-specific primer-systems was tested on DGGE gels after amplification  
200 specificity was optimized by gradient-PCRs. Only the primer-system Beta-359F/Beta-680R  
201 showed a clear separation of the DGGE bands representing the *Betaproteobacteria*-OTUs also  
202 of very closely related phlotypes. The primer-system showed a high specificity because all  
203 sequenced DGGE bands represented *Betaproteobacteria* (Table 1, Fig. 10). The primer-system  
204 was established by [20], where it was only used as a first PCR as template for a Nested-PCR  
205 approach for DGGE analysis with universal *Bacteria* primers.



206 For *Actinobacteria*-specific RT-PCR DGGE analysis we used the primer-system  
207 HGC236F/HGC664R [21] that was established for DGGE analysis by [22]. Sequence analysis  
208 of selective DGGE bands showed that DNA bands were affiliated to *Actinobacteria* and –  
209 mainly under elevated  $^1\text{O}_2$  exposure – also to *Verrucomicrobia* (Fig. 9). Occasional detection of  
210 *Verrucomicrobia* has been previously observed by [22]. This unspecific amplification did not  
211 affect our results in regard to effects of  $^1\text{O}_2$  and  $\text{H}_2\text{O}_2$  on *Actinobacteria*, because we sequenced  
212 all predominant DNA bands.

213 At first, we also aimed to investigate changes of BCC within the *Alphaproteobacteria*.  
214 Therefore, we tried to use the primer Alf986, which is based on the FISH probe established by  
215 [23]. For DGGE analysis we combined this primer with two different *Bacteria* forward primers,  
216 GC-339F and GC-517F. The resolution of DGGE patterns was reasonably good, but sequence  
217 analysis of abundant DGGE bands showed that *Polynucleobacter* sp. (*Betaproteobacteria*) and  
218 *Actinobacteria* represented the most abundant DGGE bands next to the DGGE band  
219 representing *N. acidiphilum* (*Alphaproteobacteria*) (data not shown). Therefore, instead of  
220 investigating all *Alphaproteobacteria* we focused on the *Sphingomonadaceae*-specific RT-PCR  
221 DGGE analysis (Fig. 10). At first we aimed to use the primer-system Sphingo108F/GC-  
222 Sphingo420R established for *Sphingomonadaceae*-specific DGGE analysis by [24]. However,  
223 the reverse primer used by [24] had two mismatches in the 16S rRNA gene sequence of *N.*  
224 *acidiphilum*, the most abundant *Alphaproteobacterium* in the south-west basin of Lake Grosse  
225 Fuchskuhle. Therefore, we used the *Alphaproteobacteria*-specific primer ADF689R as reverse  
226 primer. Unfortunately, several *Novosphingobium* type strains did not show a clear separation of  
227 DGGE bands and resulted in up to three DGGE bands for one strain. Based on these results, we  
228 decided to use a nested-PCR approach with the *Sphingomonadaceae*-specific primer-system  
229 Sphingo108F/Alf968R for pre-amplification and the *Bacteria* primer-system GC-339F/907R  
230 for amplification for DGGE analysis. Different *Sphingomonadaceae* isolates observed from the  
231 SW basin were clearly separated by this approach (data not published). Sequence analysis of

232 the DGGE bands determined in the *Sphingomonadaceae*-specific RT-PCR DGGE analysis  
233 showed that the major DNA band represented *N. acidiphilum*, whereas all other sequenced  
234 DNA bands were affiliated to *Alphaproteobacteria* other than *Sphingomonadaceae*. Those  
235 unspecific DNA bands occurred only in samples where *N. acidiphilum* seemed to be reduced in  
236 abundance as observed by *Bacteria*-specific DGGE and clone library analysis. In contrast to  
237 other *Alphaproteobacteria*, these sequences represent less abundant phlotypes since they were  
238 not observed in any 16S rRNA gene clone library or by *Bacteria* RT-PCR DGGE analysis.  
239 More abundant *Alphaproteobacteria* determined by *Bacteria* based analysis were not found.  
240 Our results indicate that *N. acidiphilum* was the predominant *Sphingomonadaceae* species in  
241 the SW basin at the time when all experiments were performed. No further  
242 *Sphingomonadaceae* were detected.

243

244

245 **References**

- 246 1. Baxter RM, Carey JH (1983) Evidence for photochemical generation of superoxide ion in  
247 humic waters. *Nature* 306: 575-576.
- 248 2. Cooper WJ (1989) Sunlight induced photochemistry of humic substances in natural waters:  
249 major reactive species. *Adv Chem Ser* 219: 332-362.
- 250 3. Zepp RG, Wolfe NL, Baughman GL, Hollis RC (1977) Singlet oxygen in natural waters.  
251 *Nature* 267: 421-423.
- 252 4. Cooper WJ, Lean DRS (1989) Hydrogen-peroxide concentration in a northern lake -  
253 photochemical formation and diel variability. *Environ Sci Technol* 23: 1425-1428.
- 254 5. Weishaar JL, Aiken GR, Bergamaschi BA, Fram MS, Fujii R, et al. (2003) Evaluation of  
255 specific ultraviolet absorbance as an indicator of the chemical composition and  
256 reactivity of dissolved organic carbon. *Environ Sci Technol* 37: 4702-4708.
- 257 6. Haag WR, Hoigne J (1986) Singlet oxygen in surface waters. 3. Photochemical formation  
258 and steady-state concentrations in various types of waters. *Environ Sci Technol* 20:  
259 341-348.
- 260 7. Glaeser SP, Grossart H-P, Glaeser J (2010) Singlet oxygen, a neglected but important  
261 environmental factor: short-term and long-term effects on bacterioplankton composition  
262 in a humic lake. *Environ Microbiol* 12: 3123-3136.
- 263 8. Tranvik L, Kokalj S (1998) Decreased biodegradability of algal DOC due to interactive  
264 effects of UV radiation and humic matter. *Aquat Microb Ecol* 14: 301-307.
- 265 9. Dalrymple RM, Carfagno AK, Sharpless CM (2010) Correlations between dissolved organic  
266 matter optical properties and quantum yields of singlet oxygen and hydrogen peroxide.  
267 *Environ Sci Technol* 44: 5824-5829.
- 268 10. Häkkinen PJ, Anesio AM, Granéli W (2004) Hydrogen peroxide distribution, production,  
269 and decay in boreal lakes. *Can J Fish Aqua Sci* 61: 1520-1527.

- 270 11. Sachse A, Babenzien D, Ginzel G, Gelbrecht J, Steinberg CEW (2001) Characterization of  
271 dissolved organic carbon (DOC) in a dystrophic lake and an adjacent fen. *Biochemistry*  
272 54: 279-296.
- 273 12. Buck U, Babenzien HD, Zwirnmann E (2008) Extracellular peroxidase activity in an  
274 experimentally divided lake (Grosse Fuchskuhle, northern Germany). *Aquat Microb*  
275 *Ecol* 51: 97-103.
- 276 13. Lane DJ (1991) 16S/23S rRNA sequencing. In: Stackebrandt E, Goodfellow M, editors.  
277 *Nucleic acid techniques in bacterial systematics*. Chichester: John Wiley. pp. 115-174.
- 278 14. Tamura K, Peterson D, Peterson N, Stecher G, Nei M, et al. (2011) MEGA5: Molecular  
279 Evolutionary Genetics Analysis Using Maximum Likelihood, Evolutionary Distance,  
280 and Maximum Parsimony Methods. *Mol Biol Evol* 28: 2731-2739.
- 281 15. Wang Q, Garrity GM, Tiedje JM, Cole JR (2007) Naive Bayesian classifier for rapid  
282 assignment of rRNA sequences into the new bacterial taxonomy. *Appl Environ*  
283 *Microbiol* 73: 5261-5267.
- 284 16. Altschul SF, Gish W, Miller W, Myers EW, Lipman DJ (1990) Basic local alignment  
285 search tool. *J Mol Biol* 215: 403-410.
- 286 17. Ashelford KE, Chuzhanova NA, Fry JC, Jones AJ, Weightman AJ (2005) At least 1 in 20  
287 16S rRNA sequence records currently held in public repositories is estimated to contain  
288 substantial anomalies. *Appl Environ Microbiol* 71: 7724-7736.
- 289 18. Wilson JB (1991) Methods for fitting dominance diversity curves. *J Veg Sci* 2: 35-46.
- 290 19. Allgaier M, Grossart H-P (2006) Diversity and seasonal dynamics of *Actinobacteria*  
291 populations in four lakes in northeastern Germany. *Appl Environ Microbiol* 72: 3489-  
292 3497.
- 293 20. Mühling M, Woolven-Allen J, Murrell JC, Joint I (2008) Improved group-specific PCR  
294 primers for denaturing gradient gel electrophoresis analysis of the genetic diversity of  
295 complex microbial communities. *ISME J* 2: 379-392.

- 296 21. Glöckner FO, Zaichikov E, Belkova N, Denissova L, Pernthaler J, et al. (2000)  
297 Comparative 16S rRNA analysis of lake bacterioplankton reveals globally distributed  
298 phylogenetic clusters including an abundant group of *Actinobacteria*. Appl Environ  
299 Microbiol 66: 5053-5065.
- 300 22. Allgaier M, Bruckner S, Jaspers E, Grossart HP (2007) Intra- and inter-lake variability of  
301 free-living and particle-associated *Actinobacteria* communities. Environ Microbiol 9:  
302 2728-2741.
- 303 23. Neef, A (1997) Anwendung der *in situ*-Einzelzell-identifizierung von Bakterien zur  
304 Populationsanalyse in komplexen mikrobiellen Biozönosen. Dissertation Technical  
305 University of Munich.
- 306 24. Leys NM, Ryngaert A, Bastiaens L, Top EM, Verstraete W, et al. (2005) Culture  
307 independent detection of *Sphingomonas* sp EPA 505 related strains in soils  
308 contaminated with polycyclic aromatic hydrocarbons (PAHs). Microb Ecol 49: 443-450.  
309  
310  
311
